## **Outbreak-associated *Salmonella* Baildon found in wastewater demonstrates how sewage monitoring can supplement traditional disease surveillance**

Nkuchia M. M'ikanatha<sup>1,2,3</sup>, Zoe S. Goldblum<sup>3</sup>, Nicholas Cesari<sup>1</sup>, Erin M. Nawrocki<sup>3\*</sup>, Yezhi Fu<sup>3#</sup>, Jasna Kovac<sup>3</sup>, and Edward G. Dudley<sup>3,4</sup>

1

<sup>1</sup>Division of Infectious Disease Epidemiology, Pennsylvania Department of Health, Harrisburg, PA, USA; <sup>2</sup>Center for Clinical Epidemiology and Biostatistics, Perelman School of Medicine, University of Pennsylvania, Philadelphia, PA, USA; <sup>3</sup>Department of Food Science, The Pennsylvania State University, University Park, PA, USA; <sup>4</sup> The *E. coli* Reference Center, The Pennsylvania State University, University Park, PA, USA Current address \*Department of Microbiology and Molecular Genetics, University of Pittsburgh, Pittsburgh, Pennsylvania #School of Agriculture, Shenzhen Campus of Sun Yat-sen University, Shenzhen, China

Corresponding Author and Reprints:

Nkuchia M. M'ikanatha, DrPH, MPH; ORCID: <https://orcid.org/0000-0002-5631-184X>

Division of Infectious Disease Epidemiology

Pennsylvania Department of Health

Harrisburg, PA 17120

Telephone (717) 787 3350; Fax (717) 772 6975 E-mail: [nmikanatha@pa.gov](mailto:nmikanatha@pa.gov)

Word count: Abstract 225; Importance 122; text 2,387. Table 1; Figures 3, and two Supplemental tables

2

3 **Keywords:** *Salmonella*, communicable disease, food safety, foodborne infections,  
4 disease outbreaks, foodborne pathogens, domestic wastewater surveillance,  
5 epidemiological monitoring

6 **Abstract**

7 Non-typhoidal *Salmonella* is a common cause of gastroenteritis worldwide, but current  
8 non-typhoidal *Salmonella* surveillance is suboptimal. Here we evaluated the utility of  
9 wastewater monitoring to enhance surveillance for this foodborne pathogen. In June  
10 2022, we tested composite raw sewage collected twice a week from two treatment plants  
11 in central Pennsylvania for non-typhoidal *Salmonella* and characterized isolates using  
12 whole genome sequencing. We recovered 43 *Salmonella* isolates from wastewater  
13 samples, differentiated by genomic analysis into seven serovars: 16 Panama (37.2%), 9  
14 Senftenberg (20.9%), and 8 Baildon (18.6%), 3 or fewer for four other serovars. We  
15 assessed genetic relatedness and epidemiologic links between non-typhoidal *Salmonella*  
16 serovars from wastewater and isolates from patients with salmonellosis. All *S. Baildon*  
17 serovars from wastewater were genetically and epidemiologically associated with a  
18 known salmonellosis outbreak. *S. Baildon* from wastewater and 42 outbreak-related  
19 isolates in the national outbreak detection database had the same core genome  
20 multilocus sequence typing and code differed by no or one single polynucleotide  
21 polymorphisms. One of the 42 outbreak-related isolates was obtained from a patient  
22 residing in the wastewater sample collection catchment area, which serves  
23 approximately 17000 people. *S. Baildon* is a rare serovar (reported in <1% cases  
24 nationally over five years). Our study underscores the value of monitoring sewage from  
25 a defined population to supplement traditional surveillance methods for evidence of  
26 *Salmonella* infections and to determine the extent of outbreaks.

27

28

## 29 **Importance statement**

30 During the COVID-19 pandemic, surveillance for SARS-CoV-2 in wastewater was a  
31 powerful tool for assessing community burden days ahead of traditional reporting. Here,  
32 we show that domestic sewage monitoring is useful for surveillance for a foodborne  
33 pathogen. *Salmonella enterica* was detected in samples from two wastewater treatment  
34 plants in central Pennsylvania during June 2022. Using whole genome sequencing, we  
35 demonstrated that isolates of variant *S. Baildon* clustered with those from an outbreak  
36 that occurred in a similar time frame. Case reports were primarily from Pennsylvania,  
37 and one individual lived within the treatment center catchment area. This study  
38 provides support for the utility of domestic sewage surveillance in assisting public health  
39 agencies identify communities impacted by infectious diseases.

40

## 41 **Introduction**

42 Non-typhoidal *Salmonella* is a common cause of gastroenteritis worldwide. Current  
43 non-typhoidal *Salmonella* surveillance systems are based on reporting by healthcare  
44 professionals and clinical laboratories (1-3). Although there are variations across  
45 jurisdictions, the sensitivity and timeliness of these systems to detect outbreaks is  
46 limited by under-reporting, incomplete case reports, and resource constraints (4).  
47 Although an estimated 1.03 million cases of salmonellosis occur annually in the United  
48 States associated with 74,000 physician visits, 19,000 hospitalizations, 378 deaths, and  
49 \$4.14 billion in direct and indirect costs (<https://www.ers.usda.gov/data-products/cost-estimates-of-foodborne-illnesses/>), in 2023, only 52,575 salmonellosis cases were  
51 reported by all jurisdictions in the United States through the National Notifiable

52 Diseases Surveillance System ([https://wonder.cdc.gov/nndss/static/2023/52/2023-52-](https://wonder.cdc.gov/nndss/static/2023/52/2023-52-table1122.html)  
53 [table1122.html](https://wonder.cdc.gov/nndss/static/2023/52/2023-52-table1122.html)),

54 For diseases such as salmonellosis and COVID-19, unrecognized cases can amplify  
55 transmission (5-6). Evidence of infection can be detected in stool samples from  
56 approximately 90% of individuals infected with *Salmonella* and 40% of those with  
57 SARS-CoV2 (7-8). Identification and quantification of SARS-CoV-2 RNA in untreated  
58 influents from domestic wastewater treatment plants augmented traditional disease  
59 reporting during the pandemic and is now a major component of the COVID-19  
60 surveillance in the United States (9). Wastewater-based surveillance detects SARS-CoV-  
61 2 RNA before the peak of clinical cases and has been shown to identify variants of  
62 concern prior to presentation in patients (10-11). Emergency appropriations in 2021  
63 expanded wastewater-based surveillance efforts for COVID-19 through the US Food and  
64 Drug Administration GenomeTrakr program which has been focused on foodborne  
65 pathogens (12).

66 We participated in the wastewater monitoring for SARS-CoV-2 variants as part of the  
67 GenomeTrakr network laboratories and reasoned that the same monitoring could be  
68 useful for non-typhoidal *Salmonella* surveillance. The Pennsylvania Department of  
69 Health Bureau of Laboratories performs whole genome sequencing of non-typhoidal  
70 *Salmonella* found in clinical samples and uploads data to the Centers for Disease  
71 Control and Prevention (CDC) PulseNet program to facilitate outbreak investigations  
72 (13). Diagnostic laboratories send presumptive *Salmonella* isolates in compliance with  
73 communicable disease requirements, which also mandates the reporting of detailed  
74 patient information, including demographic characteristics, via the secure Pennsylvania

75 National Electronic Disease Reporting system (PA-NEDSS) (14). Investigations of  
76 individual salmonellosis cases and outbreaks are documented in PA-NEDSS (15).  
77 Additionally, Pennsylvania sends some isolates from patients and all non-typhoidal  
78 *Salmonella* isolates found in retail food sources to the National Antimicrobial  
79 Resistance Monitoring System (NARMS) laboratories at the CDC and the Food and  
80 Drug Administration (FDA), respectively (16).

81 By leveraging the SARS-CoV-2 variants project and the existing state and national  
82 public health systems for salmonellosis (13-16), we conducted a study to assess whether  
83 wastewater-based surveillance could enhance surveillance for non-typhoidal  
84 *Salmonella*. We hypothesized that *Salmonella* strains linked to recent outbreaks would  
85 be detected in domestic sewage.

86

## 87 **Materials and Methods**

### 88 *Catchment area population and characteristics*

89 Samples were collected from two wastewater treatment facilities in central  
90 Pennsylvania. A wastewater treatment plant manager in each facility completed a brief  
91 survey that included information on the number of customers and presence of  
92 institutional residential facilities such as prisons within the catchment area. We used the  
93 household equivalent (customers served) combined with United States Census Bureau  
94 data to estimate the total population of each catchment area  
95 (<https://www.census.gov/quickfacts/fact/table/PA/HSG010222>). Twice weekly during  
96 June 13-29, 2022, a plant operator at each facility collected a 24-hour composite  
97 untreated sewage sample upstream of the primary clarifier following the United States

98 Environmental Protection Agency protocol for sample collection  
99 (<https://www.epa.gov/quality/procedures-collecting-wastewater-samples>). Samples  
100 were stored at 4 °C in the dark for less than 48 h prior to being transported on ice to the  
101 laboratory for processing.

#### 102 *Detection of Salmonella in raw wastewater*

103 We followed standardized procedures for isolation of *Salmonella* (17-18). Briefly, we  
104 transferred 120 ml into a bottle, centrifuged at 5,000 x *g* for 20 min at 4 °C, filtered the  
105 supernatant through a 0.45- $\mu$ m membrane and added the filter to 40 mL of buffered  
106 peptone water supplemented with 20 mg/L novobiocin. Broths were incubated at 35 °C  
107 for 24 h. Presumptive *Salmonella* colonies were sub-cultured in tetrathionate and  
108 Rappaport–Vassiliadis broths at 42 °C for 24 h. Aliquots of 10  $\mu$ L of each enriched  
109 culture were then plated on Xylose Lysine Deoxycholate (XLD) and Hektoen Enteric  
110 (HE) agar. We selected eight presumptive *Salmonella* colonies from each XLD and HE  
111 plate and were screened for *invA* by PCR (18). Forty-three were confirmed to be  
112 *Salmonella*, and thus sequenced (Supplemental Table 1).

#### 113 *Whole genome sequencing and cluster detection*

114 We extracted DNA from *Salmonella* isolates with the Qiagen DNeasy blood and tissue  
115 kit, and libraries were prepared using the Nextera XT DNA library kit. Libraries were  
116 sequenced using an Illumina MiSeq using the manufacturers reagent kits (V3) with 500  
117 (2 x 250) cycles. We uploaded the short-read sequences to the National Center for  
118 Biotechnology Information (NCBI), and the NCBI Pathogen Detection Isolate Browser  
119 (NCBI-PD) automated bioinformatics pipeline was used to process sequences and create  
120 phylogenetic single nucleotide polymorphism (SNP) trees

121 ([https://www.ncbi.nlm.nih.gov/pathogens/pathogens\\_help/#isolates-browser](https://www.ncbi.nlm.nih.gov/pathogens/pathogens_help/#isolates-browser)). The  
122 SeqSero2 application within the NCBI-PD pipeline was used to identify molecular  
123 serotypes (19). Additionally, we used the NCBI-PD pipeline-AMRFinderPlus to identify  
124 antimicrobial resistance gene sequences and mutations that matched with those in the  
125 Reference Gene Catalog (20).

### 126 *Verification of clusters and epidemiological investigations*

127 We used the CDC Systems Enteric Disease Response, Investigation, and Coordination  
128 (SEDRIC) platform to verify clustering of isolates from clinical and wastewater sources  
129 (21). SEDRIC analyses are based on core genome multilocus sequence typing, a gene-by-  
130 gene comparison approach used for outbreak cluster detection. We considered isolates  
131 from clinical and wastewater sources related if they differed by  $\leq 10$  alleles (22). SEDRIC  
132 enabled us to pinpoint each isolate by geographic location, temporality, allele code, and  
133 associated multi-state outbreak code, if any. For related isolates from Pennsylvania, we  
134 reviewed original records on the state-based surveillance system. We also examined  
135 summaries of outbreaks including demographic and epidemiological characteristics of  
136 the case patients. To assess the potential for under-reporting, we examined  
137 salmonellosis cases reported from the catchment area during 2019-2022. We reviewed  
138 state and national surveillance systems to identify serovars associated with  
139 salmonellosis.

### 140 *Evolutionary analysis by the maximum likelihood method*

141 We analyzed the genetic relatedness of isolates from clinical and wastewater sources using the  
142 FDA Center for Food Safety and Applied Nutrition (CFSAN) SNP Pipeline on the GalaxyTrakr  
143 website as previously described (23). The generated output `snp_profile.fasta` file was used to



144 build a maximum likelihood tree using MEGA11 (Molecular Evolutionary Genetic  
145 Analysis) application (25).

#### 146 *Ethical considerations*

147 Access to data on clinical *Salmonella* isolates was approved by CDC NARMS state-based  
148 program activities.

149

## 150 **Results**

### 151 *Catchment area characteristics*

152 There were 5,600 and 1,500 equivalent households served by wastewater treatment  
153 plants A and B, respectively. The average persons per household in the state in 2022 was  
154 2.42 (<https://www.census.gov/quickfacts/fact/table/PA/HSG010222>). Thus, the total  
155 population in the catchment area of the two Pennsylvania wastewater treatment plants  
156 from which samples were collected was estimated at 17,182. Facilities reported in the  
157 survey that they received domestic sewage only, without any storm water runoff or  
158 environmental runoff such as that from farm operations or poultry processing plants.

### 159 *Salmonella serovars isolated from wastewater*

160 *Salmonella* was found in 9 of the 12 wastewater samples (75%) that were collected from  
161 the Pennsylvania plants in June 2022; 43 *Salmonella* isolates were recovered. As  
162 previously reported (26), based on whole genome assemblies, these isolates were from  
163 seven serovars: 16 were Panama (37.2%), 9 were Senftenberg (20.9%), and 8 were  
164 Baildon (18.6%). Three other serovars had 3 or fewer isolates (Fig. 2). There were no

165 clinically relevant antimicrobial resistance genes or resistance-conferring SNPs  
166 identified in any of the isolates.

167 All eight (100%) *S. Baildon* isolates from domestic sewage samples were separated by 0  
168 or 1 SNPs from 46 clinical isolates identified in SEDRIC (Fig. 3), and all were assigned  
169 the same allele code in the national outbreak database. Forty-four (95.7%) of the clinical  
170 isolates originated from Pennsylvania, and two (SRR19419658 and SRR19512122) were  
171 from nearby states (West Virginia and Virginia) (Supplemental Table 2). One case of  
172 salmonellosis associated with *S. Baildon* was reported in a zip code within the  
173 catchment area (Fig. 1).

174 *Epidemiological investigation of genetically related S. Baildon isolates from*  
175 *wastewater and clinical sources*

176 Forty-two (91.3%) of the 46 clinical isolates were traced to a salmonellosis outbreak that  
177 occurred May 3-12, 2022 in Pennsylvania, based on the case confirmation. The outbreak  
178 was epidemiologically linked to consumption of contaminated tomato and iceberg salad  
179 (odds ratio, 7.25, 95% confidence interval (1.98-26.54);  $p=0.003$ ). The food was  
180 consumed starting on May 3, 2022 at a chain restaurant in Altoona, Pennsylvania,  
181 within an hour's driving distance from the wastewater catchment areas (Fig. 1).

182 *S. Baildon reported in the catchment areas, state and national surveillance systems*

183 Lastly, we investigated the reported prevalence of salmonellosis and *S. Baildon* on a  
184 local, state and national level. Our review of state-based surveillance found 11  
185 salmonellosis cases were reported from the catchment during 2019-2023. Further  
186 examination of state and national surveillance systems showed that during 2019-2023,  
187 *S. Baildon* infections were associated with 53 of the 8,143 cases of salmonellosis

188 reported in Pennsylvania (0.7%) and in 650 of 330,172 cases reported in the United  
189 States (0.2%) (Table 1).

190

## 191 **Discussion**

192 In June 2022, we tested untreated domestic wastewater from two facilities in central  
193 Pennsylvania that serve about 17,000 residents for non-typhoidal *Salmonella*. We  
194 isolated and sequenced 42 non-typhoidal *Salmonella* strains that were differentiated  
195 into seven serotypes. Isolates from two serovars, *S. Baildon*, as discussed here, and  
196 previously discussed *S. Senftenberg* (26), were genetically matched to clinical cases from  
197 the same time period. Infections associated with the two outbreaks were reported to  
198 public health authorities either concurrently with or immediate after we had detected  
199 *Salmonella* in wastewater samples from the catchment area. This *Salmonella* serotype is  
200 rare: *S. Baildon* accounted for less than 1% of salmonellosis cases reported in the United  
201 States in the past five years (Table 1). This rarity combined with genetic, geographic, and  
202 temporal relatedness, suggests that *S. Baildon* in the wastewater was from active or  
203 asymptomatic human infections.

204 Our study and previous investigations suggest that wastewater-based surveillance can  
205 augment traditional patient-provider encounter-based surveillance. *S. Derby* strains  
206 isolated from wastewater in Hawaii were associated with asymptomatic cases  
207 undetected by the traditional surveillance system (27). In Texas, wastewater testing  
208 successfully identified *S. Heidelberg*, the causative agent, during and after a 2003  
209 salmonellosis outbreak in a closed community (28). Consistent with our findings,  
210 Sahlström et al. found that *Salmonella* serotypes from sewage and salmonellosis cases

211 in Sweden were genetically indistinguishable (29). Moreover, when Berge et al.  
212 compared *Salmonella* serotypes from two wastewater treatment plants in California  
213 with similar bacteria from patients, they concluded that unreported infections likely  
214 accounted for the differences in serovars observed (30).

215 The *S. Baidon* isolates we identified in wastewater in Pennsylvania were genetically  
216 indistinguishable from those epidemiologically linked to the consumption of  
217 contaminated salad. *S. Baidon* has caused two others previously reported multi-state  
218 outbreaks, which reoccurred 10 years apart starting in 1998 ((31) and  
219 (<https://www.cdc.gov/salmonella/2010/restaurant-chain-a-8-4-10.html>)). Traceback  
220 investigations concluded that contamination occurred on farm and in the cutting and  
221 packing facilities in the 1998-1999 and in the 2010 outbreaks, respectively. The source  
222 of the contaminated produce responsible for the *S. Baidon* outbreak that was  
223 concomitant with our wastewater detection was not identified.

224 The current study found that most of the genetically similar outbreak-associated *S.*  
225 *Baidon* cases occurred in relative proximity to the catchment areas where wastewater  
226 samples were collected. The CDC estimates that only 1 in 29 *Salmonella* infections are  
227 identified by traditional surveillance (32). Severe *Salmonella* cases including those  
228 caused by *S. Baidon* are likely reported to public health authorities ((31) and  
229 (<https://www.cdc.gov/salmonella/2010/restaurant-chain-a-8-4-10.html>)), whereas  
230 mild or asymptomatic infections are not (1-4). The available crude incidence rate for  
231 *Salmonella* per 100,000 was 17 cases prior to 2019 and 16.3 cases thereafter (1-2). The  
232 potential for unreported illnesses is likely because the wastewater catchment area  
233 included two facilities where residents have an elevated risk for gastroenteritis. Carceral

234 populations experience a disproportionately high rate of foodborne infections including  
235 salmonellosis (33).

236 Our study was limited by the collection of samples from only two wastewater plants,  
237 both convenient to our laboratory. However, the catchment area population is  
238 comparable to those in the typical rural municipalities in Pennsylvania, which are home  
239 to about 26% of the state's 13.0 million residents ([https://www.rural.pa.gov/data/rural-](https://www.rural.pa.gov/data/rural-quick-facts)  
240 [quick-facts](https://www.rural.pa.gov/data/rural-quick-facts)). The less than a month duration of the wastewater testing is also a  
241 limitation as isolation rates for *Salmonella* likely vary over time. Another weakness  
242 inherent in the use surveillance data is the uncertainty regarding reported cases of most  
243 infectious diseases. The use of multiple sources of data in the current study is one of its  
244 strengths. The domestic sewage we tested excluded non-human sources of *Salmonella*  
245 such as wild animals or contaminated poultry products. Although absolute certainty is  
246 impossible, the genetic association with a concurrent outbreak in the area is consistent with  
247 an origin in contaminated salad. Based on FDA NARMS retail food data, *S. Baildon* has  
248 never been detected in the more than 200,000 samples tested since the inception of the  
249 program in 1997 (data not shown). Antimicrobial resistance genes are commonly found  
250 in *Salmonella* isolated from poultry meat ([https://www.fda.gov/animal-](https://www.fda.gov/animal-veterinary/national-antimicrobial-resistance-monitoring-system/narms-now-integrated-data)  
251 [veterinary/national-antimicrobial-resistance-monitoring-system/narms-now-](https://www.fda.gov/animal-veterinary/national-antimicrobial-resistance-monitoring-system/narms-now-integrated-data)  
252 [integrated-data](https://www.fda.gov/animal-veterinary/national-antimicrobial-resistance-monitoring-system/narms-now-integrated-data)), but these genes were not detected in the *S. Baildon* isolated from  
253 wastewater.

254 Our study corroborates observations reports from investigations in Hawaii, Texas,  
255 Sweden, and California on the value of wastewater surveillance for *Salmonella* (27-30).

256 Previous studies have cited obstacles to wastewater monitoring include complexity,

257 perceived threat to privacy, untimeliness, insensitivity, and lack of specificity (34-35).  
258 However, the anonymity and non-intrusiveness of wastewater monitoring makes it  
259 attractive for illuminating the blind spots in the traditional surveillance systems (3-4,  
260 36). Wastewater monitoring could be explored to augment the current resource-  
261 intensive patient encounter system in populations at elevated risk for salmonellosis  
262 outbreaks, in particular among the 1.9 million people living in over 6,000 carceral  
263 settings such as local jails, state prisons, and immigration detention facilities (33,  
264 <https://www.prisonpolicy.org/reports/pie2023.html#bigpicture>). Additionally,  
265 foodborne outbreaks are common among an estimated 1.3 million individuals (some  
266 frail) living in more than 1,500 predominately for-profit nursing home facilities  
267 (<https://www.cdc.gov/nchs/fastats/nursing-home-care.htm>, 37). Our study  
268 demonstrates that pathogen genomics could be used through partnership among public  
269 health jurisdictions and academic collaborators to monitor wastewater to enhance  
270 surveillance for *Salmonella*, particularly in vulnerable populations.

271

272

273

#### 274 **Data availability**

275 Sequence short reads for all wastewater isolates were uploaded to the NCBI under  
276 BioProject PRJNA357723. Accession numbers are provided in Supplementary Tables 1  
277 and 2 for isolates from sewage and clinical sources, respectively.

278

279 **Figure legends**

280  
281 **Figure 1.** Locations of domestic sewage treatment plant catchment areas (green) and  
282 locations of zip codes where clinical cases were reported with numbers of cases  
283 indicated by sizes of the red dots. Also indicated are the location of the Clearfield County  
284 Jail, and Moshannon Valley Processing Center, which in addition to community  
285 households are included in the catchment area.

286  
287  
288 **Figure 2.** Distribution of non-typhoidal *Salmonella* serotypes identified among the 43  
289 isolates collected during June 2022. The catchment area served by two wastewater  
290 treatment plants in central Pennsylvania served a total population of approximately  
291 17,182.

292  
293  
294 **Figure 3.** Genetic relatedness of *S. Baildon* isolates (n=8) from sewage sources  
295 (marked green) and clinical sources (n=46). Isolates from sewage samples were  
296 separated by 0 or 1 single nucleotide polymorphisms from those linked to salmonellosis.  
297 The tree is drawn to scale, with branch lengths measured in the number of substitutions  
298 per site. Evolutionary analyses were conducted in MEGA11 (30).

299  
300  
301  
302 **Acknowledgements**

303 Funding was provided by the Centers for Disease Control and Prevention Epidemiology  
304 and Laboratory Capacity (ELC) for collaboration in National Antimicrobial Resistance

305 Monitoring (CDC-RFA-CI10-101204PPHF13), U.S. Food and Drug Administration grant  
306 number 1U01FD006253-01 to PADOH for collaboration in the National Antimicrobial  
307 Resistance Monitoring System, and the US Food and Drug Administration (Grant No.  
308 1U19FD007114-01) to E.G.D. E.M.N was funded by a USDA-NIFA Postdoctoral  
309 Fellowship 2021-67034-35120. E.G.D. was additionally supported by USDA National  
310 Institute of Food and Agriculture and Hatch Appropriations PEN4826, and J.K. was  
311 supported by PEN04853 and Multistate project 4666. No sponsors had any role in the  
312 design and conduct of the study; collection, management, analysis, or interpretation of  
313 the data; or in preparation, review, or approval of the manuscript.

314

315

## 316 **References**

- 317 1. Delahoy MJ, Shah HJ, Weller DL, et al. Preliminary Incidence and Trends of  
318 Infections Caused by Pathogens Transmitted Commonly Through Food -  
319 Foodborne Diseases Active Surveillance Network, 10 U.S. Sites, 2022. *MMWR*  
320 *Morb Mortal Wkly Rep.* 2023;72(26):701-706. Published 2023 Jun 30.
- 321 2. Office of the Assistant Secretary for Health, Office of the Secretary, U.S. Department  
322 of Health and Human Services. Reduce infections caused by Salmonella — FS-04.
- 323 3. Roush S, Birkhead G, Koo D, Cobb A, Fleming D. Mandatory reporting of diseases  
324 and conditions by health care professionals and laboratories. *JAMA.*  
325 1999;282(2):164-170. doi:10.1001/jama.282.2.164
- 326 4. Scallan E, Jones TF, Cronquist A, et al. Factors associated with seeking medical care  
327 and submitting a stool sample in estimating the burden of foodborne illness.  
328 *Foodborne Pathog Dis.* 2006;3(4):432-438. doi:10.1089/fpd.2006.3.432
- 329 5. Qiu X, Nergiz AI, Maraolo AE, Bogoch II, Low N, Cevik M. The role of asymptomatic  
330 and pre-symptomatic infection in SARS-CoV-2 transmission-a living systematic  
331 review. *Clin Microbiol Infect.* 2021;27(4):511-519. doi:10.1016/j.cmi.2021.01.011
- 332 6. Marzel A, Desai PT, Goren A, et al. Persistent Infections by Nontyphoidal Salmonella  
333 in Humans: Epidemiology and Genetics. *Clin Infect Dis.* 2016;62(7):879-886.  
334 doi:10.1093/cid/civ1221
- 335 7. Jones TF, Ingram LA, Cieslak PR, et al. Salmonellosis outcomes differ substantially  
336 by serotype. *J Infect Dis.* 2008;198(1):109-114. doi:10.1086/588823
- 337 8. Guo M, Tao W, Flavell RA, Zhu S. Potential intestinal infection and faecal-oral  
338 transmission of SARS-CoV-2. *Nat Rev Gastroenterol Hepatol.* 2021;18(4):269-  
339 283. doi:10.1038/s41575-021-00416-6



- 340 9. Peccia J, Zulli A, Brackney DE, et al. Measurement of SARS-CoV-2 RNA in  
341 wastewater tracks community infection dynamics. *Nat Biotechnol* 2020;38:1164-  
342 7. <https://doi.org/10.1038/s41587-020-0684-zexternal icon>  
343 PMID:32948856external icon
- 344 10. Sutton M, Radniecki TS, Kaya D, et al. Detection of SARS-CoV-2 B.1.351 (Beta)  
345 Variant through Wastewater Surveillance before Case Detection in a Community,  
346 Oregon, USA. *Emerg Infect Dis.* 2022;28(6):1101-1109.  
347 doi:10.3201/eid2806.211821
- 348 11. Karthikeyan S, Levy JI, De Hoff P, et al. Wastewater sequencing reveals early cryptic  
349 SARS-CoV-2 variant transmission. *Nature.* 2022;609(7925):101-108.  
350 doi:10.1038/s41586-022-05049-6
- 351 12. Timme RE, Windsor A, Ramachandran P, Muruvanda T. SARS-CoV-2 wastewater  
352 variant surveillance: pandemic response leveraging FDA's GenomeTrakr  
353 network. *medRxiv.* 2024 Jan 11; [posted 2024 Jan 11].  
354 doi:10.1101/2024.01.10.24301101
- 355 13. Swaminathan B, Barrett TJ, Hunter SB, Tauxe RV; CDC PulseNet Task Force.  
356 PulseNet: the molecular subtyping network for foodborne bacterial disease  
357 surveillance, United States. *Emerg Infect Dis.* 2001;7(3):382-389.  
358 doi:10.3201/eid0703.010303
- 359 14. Pennsylvania Code. Title 28: Health and Safety. Chapter 27: Communicable and  
360 Non-Communicable Diseases. (2023).
- 361 15. Pennsylvania Code. Title 28: Health and Safety. Chapter 27: Communicable and  
362 Noncommunicable Diseases. 33 Pa. B. 2439 (2003 addendum on Electronic  
363 Disease Surveillance System). [Pa.B. Doc. No. 03-941. Filed for public inspection  
364 May 16, 2003, 9:00 a.m].
- 365 16. Gilbert JM, White DG, McDermott PF. The US national antimicrobial resistance  
366 monitoring system. *Future Microbiol.* 2007;2(5):493-500.  
367 doi:10.2217/17460913.2.5.493
- 368 17. Andrews WH, Wang H, Jacobson A, Hammack T. Chapter 5. Salmonella. In:  
369 *Bacteriological Analytical Manual*. Food and Drug Administration; 2018.  
370 [https://www.fda.gov/food/foodscienceresearch/  
371 laboratorymethods/ucm070149.htm](https://www.fda.gov/food/foodscienceresearch/laboratorymethods/ucm070149.htm)
- 372 18. Ferretti R, Mannazzu I, Cocolin L, Comi G, Clementi F. Twelve-hour PCR-based  
373 method for detection of Salmonella spp. in food. *Appl Environ Microbiol.*  
374 2001;67(2):977-978. doi:10.1128/AEM.67.2.977-978.2001
- 375 19. Zhang S, den Bakker HC, Li S, et al. SeqSero2: Rapid and Improved Salmonella  
376 Serotype Determination Using Whole-Genome Sequencing Data. *Appl Environ*  
377 *Microbiol.* 2019;85(23):e01746-19. doi:10.1128/AEM.01746-19
- 378 20. Feldgarden M, Brover V, Gonzalez-Escalona N, et al. AMRFinderPlus and the  
379 Reference Gene Catalog facilitate examination of the genomic links among  
380 antimicrobial resistance, stress response, and virulence. *Sci Rep.*  
381 2021;11(1):12728. Published 2021 Jun 16. doi:10.1038/s41598-021-91456-0
- 382 21. Marshall KE, Nguyen TA, Ablan M, et al. Investigations of Possible Multistate  
383 Outbreaks of Salmonella, Shiga Toxin-Producing Escherichia coli, and Listeria  
384 monocytogenes Infections - United States, 2016. *MMWR Surveill Summ.*  
385 2020;69(6):1-14. doi:10.15585/mmwr.ss6906a1

- 386 22. Besser JM, Carleton HA, Trees E, et al. Interpretation of Whole-Genome Sequencing  
387 for Enteric Disease Surveillance and Outbreak Investigation. *Foodborne Pathog*  
388 *Dis.* 2019;16(7):504-512. doi:10.1089/fpd.2019.265
- 389 23. Gangiredla J, Rand H, Benisatto D, et al. GalaxyTrakr: a distributed analysis tool for  
390 public health whole genome sequence data accessible to non-  
391 bioinformaticians. *BMC Genomics.* 2021;22(1):114. Published 2021 Feb 10.  
392 doi:10.1186/s12864-021-07405-8
- 393 24. Tamura K. and Nei M. (1993). Estimation of the number of nucleotide substitutions  
394 in the control region of mitochondrial DNA in humans and chimpanzees.  
395 *Molecular Biology and Evolution* 10:512-526.
- 396 25. Koichiro Tamura, Glen Stecher, Sudhir Kumar, MEGA11: Molecular Evolutionary  
397 Genetics Analysis Version 11, *Molecular Biology and Evolution*, Volume 38,  
398 Issue 7, July 2021, Pages 3022–3027, <https://doi.org/10.1093/molbev/msab120>
- 399 26. Goldblum ZS, M'ikanatha NM, Nawrocki EM, Cesari N, Kovac J, Dudley EG.  
400 *Salmonella* Senftenberg isolated from wastewater is linked to a 2022 multistate  
401 outbreak. medRxiv. 2024 Feb 20;2024.02.20.24302949. doi:  
402 10.1101/2024.02.20.24302949
- 403 27. Diemert S, Yan T. Municipal Wastewater Surveillance Revealed a High Community  
404 Disease Burden of a Rarely Reported and Possibly Subclinical *Salmonella*  
405 *enterica* Serovar Derby Strain. *Appl Environ Microbiol.* 2020;86(17):e00814-20.  
406 Published 2020 Aug 18. doi:10.1128/AEM.00814-20
- 407 28. Vincent V, Scott HM, Harvey RB, Alali WQ, Hume ME. Novel surveillance of  
408 *Salmonella enterica* serotype Heidelberg epidemics in a closed  
409 community. *Foodborne Pathog Dis.* 2007;4(3):375-385.  
410 doi:10.1089/fpd.2007.0025
- 411 29. Sahlström L, Aspan A, Bagge E, Danielsson-Tham ML, Albiñ A. Bacterial pathogen  
412 incidences in sludge from Swedish sewage treatment plants. *Water Res.*  
413 2004;38(8):1989-1994. doi:10.1016/j.watres.2004.01.031
- 414 30. A.C.B. Berge, E.L. Dueger, W.M. Sischo, Comparison of *Salmonella enterica* serovar  
415 distribution and antibiotic resistance patterns in wastewater at municipal water  
416 treatment plants in two California cities, *Journal of Applied Microbiology*,  
417 Volume 101, Issue 6, 1 December 2006, Pages 1309–1316,
- 418 31. Cummings K, Barrett E, Mohle-Boetani JC, et al. A multistate outbreak of  
419 *Salmonella enterica* serotype Baildon associated with domestic raw tomatoes.  
420 *Emerg Infect Dis.* 2001;7(6):1046-1048. doi:10.3201/eid0706.010625
- 421 32. Scallan E, Hoekstra RM, Angulo FJ, et al. Foodborne illness acquired in the United  
422 States--major pathogens. *Emerg Infect Dis.* 2011;17(1):7-15.  
423 doi:10.3201/eid1701.p11101
- 424 33. Marlow MA, Luna-Gierke RE, Griffin PM, Vieira AR. Foodborne Disease Outbreaks  
425 in Correctional Institutions-United States, 1998-2014. *Am J Public Health.*  
426 2017;107(7):1150-1156. doi:10.2105/AJPH.2017.303816
- 427 34. Mello MM, Meschke JS, Palmer GH. Mainstreaming Wastewater Surveillance for  
428 Infectious Disease. *N Engl J Med.* 2023;388(16):1441-1444.  
429 doi:10.1056/NEJMp2301042
- 430 35. Diamond MB, Keshaviah A, Bento AI, et al. Wastewater surveillance of pathogens  
431 can inform public health responses. *Nat Med.* 2022;28(10):1992-1995.  
432 doi:10.1038/s41591-022-01940-

- 433 36. Levy JI, Andersen KG, Knight R, Karthikeyan S. Wastewater surveillance for public  
434 health. *Science*. 2023;379(6627):26-27. doi:10.1126/science.ade2503  
435 37. Utsumi M, Makimoto K, Quroshi N, Ashida N. Types of infectious outbreaks and  
436 their impact in elderly care facilities: a review of the literature. *Age Ageing*.  
437 2010;39(3):299-305. doi:10.1093/ageing/afq029

## Outbreak-associated *Salmonella* Baildon found in wastewater demonstrates how sewage monitoring can supplement traditional disease surveillance---Illustrations

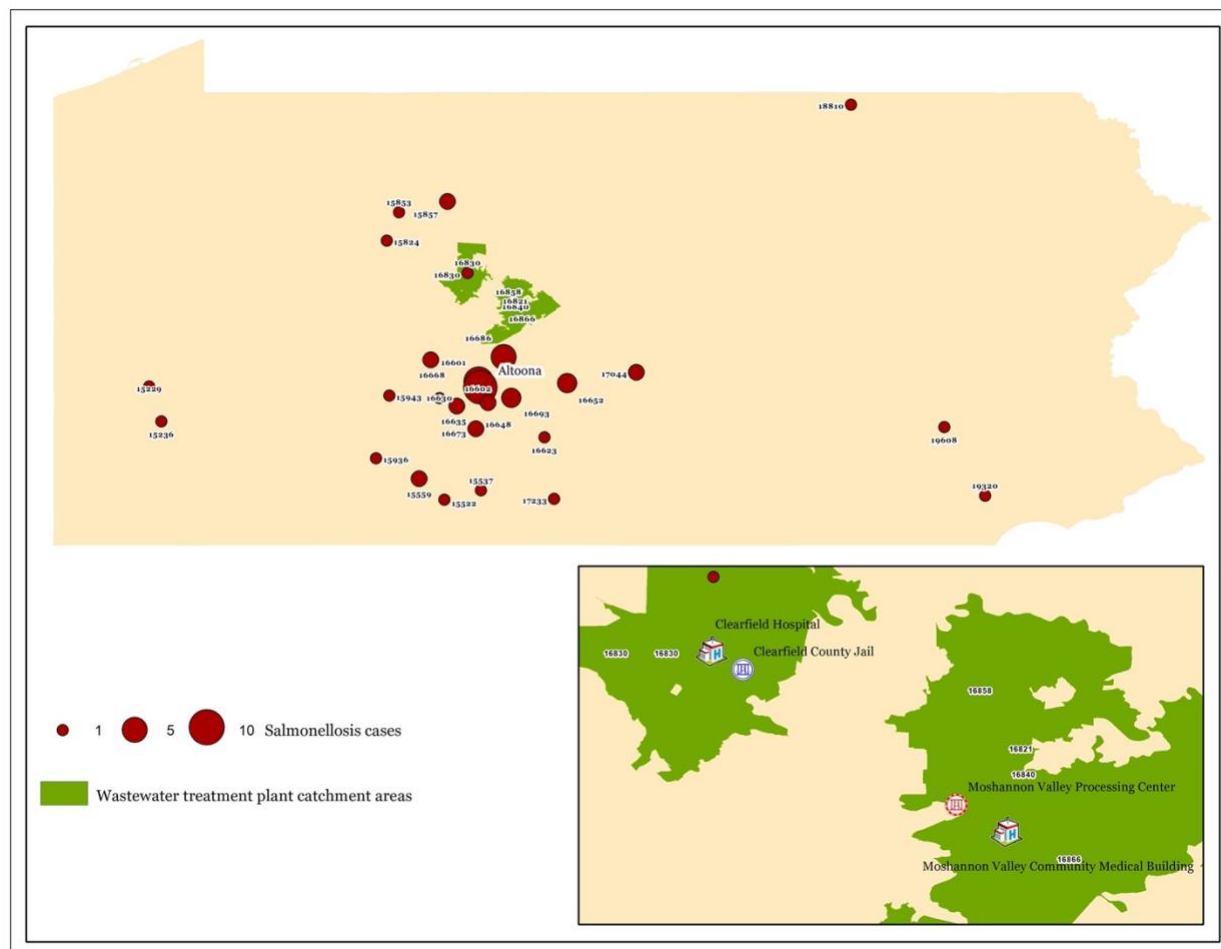

**Figure 1.** Locations of domestic sewage treatment plant catchment areas (green) and locations of zip codes where clinical cases were reported with numbers of cases indicated by sizes of the red dots. Also indicated are the location of the Clearfield County Jail, and Moshannon Valley Processing Center, which in addition to community households are included in the catchment area.

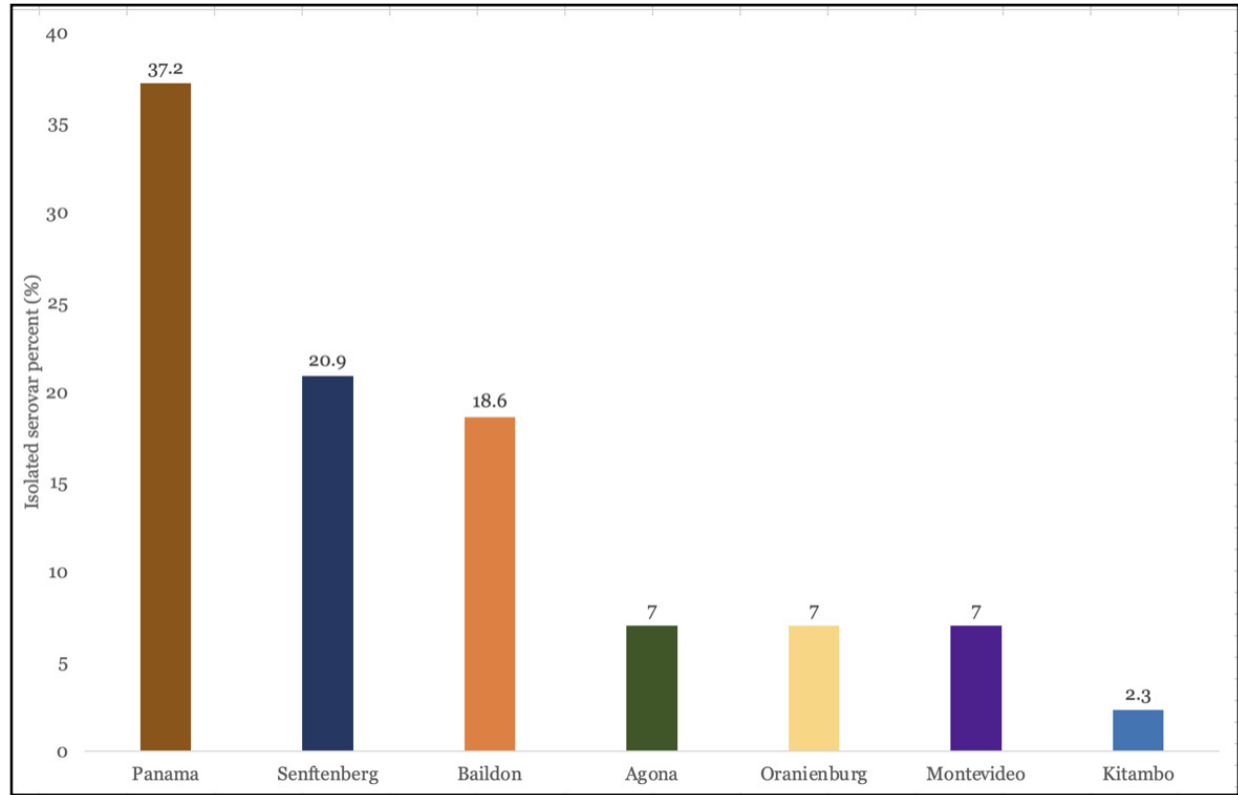

**Figure 2.** Distribution of non-typhoidal *Salmonella* serotypes identified among the 43 isolates collected during June 2022. The catchment area served by two wastewater treatment plants in central Pennsylvania served a total population of approximately 17,182.

SRR19418063 clinical USA 2022-05-26  
SRR19512128 clinical USA 2022-06-02  
SRR19417602 clinical USA 2022-05-26  
SRR19670710 clinical USA 2022-06-16  
SRR19546256 clinical USA 2022-06-07  
SRR19545401 clinical USA 2022-06-07  
SRR19546030 clinical USA 2022-06-07  
SRR19512214 clinical USA 2022-06-02  
● SRR23956631 environmental USA PA 2023-03-24  
SRR19417533 clinical USA 2022-05-26  
SRR19537178 clinical USA 2022-06-07  
SRR19512667 clinical USA 2022-06-02  
SRR19882249 clinical USA 2022-06-28  
SRR19512650 clinical USA 2022-06-02  
SRR19417524 clinical USA 2022-05-26  
—— SRR21230238 clinical USA 2022-08-27  
SRR19512639 clinical USA 2022-06-02  
SRR19512122 clinical USA 2022-06-02  
SRR19512164 clinical USA 2022-06-02  
● SRR23956651 environmental USA PA 2023-03-24  
● SRR26146463 environmental USA PA 2023-09-22  
SRR19512211 clinical USA 2022-06-02  
● SRR23956644 environmental USA PA 2023-03-24  
● SRR24142280 environmental USA PA 2023-04-12  
SRR19512140 clinical USA 2022-06-02  
SRR19512129 clinical USA 2022-06-02  
SRR19512135 clinical USA 2022-06-02  
SRR19512137 clinical USA 2022-06-02  
● SRR23956650 environmental USA PA 2023-03-24  
—— ● SRR24142281 environmental USA PA 2023-04-12  
—— SRR19419660 clinical USA 2022-05-26  
—— SRR19512636 clinical USA 2022-06-02  
SRR19537176 clinical USA 2022-06-07  
—— SRR19594429 clinical USA 2022-06-09  
● SRR24142282 environmental USA PA 2023-04-12  
—— SRR19417632 clinical USA 2022-05-26  
—— SRR19545413 clinical USA 2022-06-07  
—— SRR19670733 clinical USA 2022-06-16  
—— SRR22895702 clinical USA 2022-12-27  
SRR19882248 clinical USA 2022-06-28  
SRR19512130 clinical USA 2022-06-02  
SRR24520323 clinical USA 2023-05-12  
SRR19537174 clinical USA 2022-06-07  
SRR19537189 clinical USA 2022-06-07  
SRR19594445 clinical USA 2022-06-09  
SRR19512643 clinical USA 2022-06-02  
SRR19537184 clinical USA 2022-06-07  
SRR20220046 clinical USA 2022-07-15  
—— SRR22214388 clinical USA 2022-11-07  
—— SRR19419658 clinical USA 2022-05-26  
—— SRR19512160 clinical USA 2022-06-02  
SRR19512123 clinical USA 2022-06-02  
—— SRR19612803 clinical USA 2022-06-10  
—— SRR23270643 clinical USA 2023-01-30

—|—

0.0010

Genetic relatedness of *S. Baildon* isolates (n=8) from sewage sources (marked green) and clinical sources (n=46). Isolates from sewage samples were separated by 0 or 1 single nucleotide polymorphisms from those linked to salmonellosis. The tree is drawn to scale, with branch lengths measured in the number of substitutions per site. Evolutionary analyses were conducted in MEGA11 (30).

| <b>Table 1. Prevalence of <i>Salmonella</i> Baildon in Pennsylvania and United States—2019-2023</b> |                                |             |                |         |                |             |
|-----------------------------------------------------------------------------------------------------|--------------------------------|-------------|----------------|---------|----------------|-------------|
| Year                                                                                                | Cases reported by jurisdiction |             |                |         |                |             |
|                                                                                                     | Pennsylvania                   |             | Catchment Area |         | United States  |             |
|                                                                                                     | NTS                            | Baildon     | NTS            | Baildon | NTS            | Baildon     |
| 2019                                                                                                | 1,574                          | 1           | 1              | 0       | 73,864         | 126         |
| 2020                                                                                                | 1,580                          | 2           | 2              | 0       | 58,930         | 137         |
| 2021                                                                                                | 1,457                          | 0           | 3              | 0       | 64,357         | 119         |
| 2022                                                                                                | 1,768                          | 47          |                | 1       | 71,528         | 143         |
| 2023                                                                                                | 1,764                          | 3           | 5              | 0       | 61,493         | 125         |
| <b>Total</b>                                                                                        | <b>8,143</b>                   | <b>53</b>   |                |         | <b>330,172</b> | <b>650</b>  |
| <b>Percent</b>                                                                                      |                                | <b>0.65</b> |                |         |                | <b>0.97</b> |

Source: System for Enteric Disease Response, Investigation, and Coordination (SEDRIC) [26] and Pennsylvania National Electronic Disease Reporting system (PA-NEDSS) (17).

| <b>Table 1. Prevalence of <i>Salmonella</i> Baildon in Pennsylvania and United States—2019-2023</b> |                                |         |                |         |               |         |
|-----------------------------------------------------------------------------------------------------|--------------------------------|---------|----------------|---------|---------------|---------|
| Year                                                                                                | Cases reported by jurisdiction |         |                |         |               |         |
|                                                                                                     | Pennsylvania                   |         | Catchment Area |         | United States |         |
|                                                                                                     | NTS                            | Baildon | NTS            | Baildon | NTS           | Baildon |
| 2019                                                                                                | 1,574                          | 1       | 1              | 0       | 73,864        | 126     |
| 2020                                                                                                | 1,580                          | 2       | 2              | 0       | 58,930        | 137     |
| 2021                                                                                                | 1,457                          | 0       | 3              | 0       | 64,357        | 119     |
| 2022                                                                                                | 1,768                          | 47      |                | 1       | 71,528        | 143     |
| 2023                                                                                                | 1,764                          | 3       | 5              | 0       | 61,493        | 125     |
| Total                                                                                               | 8,143                          | 53      |                | 1       | 330,172       | 650     |
| <b>Percent</b>                                                                                      |                                | 0.65    |                |         |               | 0.97    |

Source: System for Enteric Disease Response, Investigation, and Coordination (SEDRIC) [26] and Pennsylvania National Electronic Disease Reporting system (PA-NEDSS) (17).
